# Supplementary material
Source: publisher figshare collection journal article supplement (https://frontiersin.figshare.com/ndownloader/files/21785313)

## Supplementary materials

**Supplementary Figure 1.** Full scans of the entire original gels used in Figure 3C.

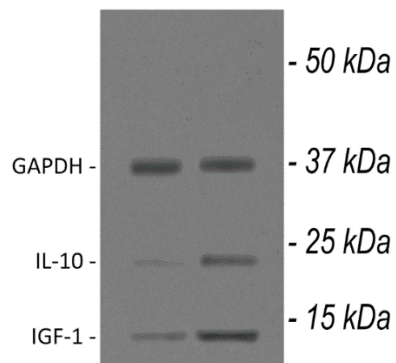

**Supplementary Figure 2.** Full scans of the entire original gels used in Figure 4A.

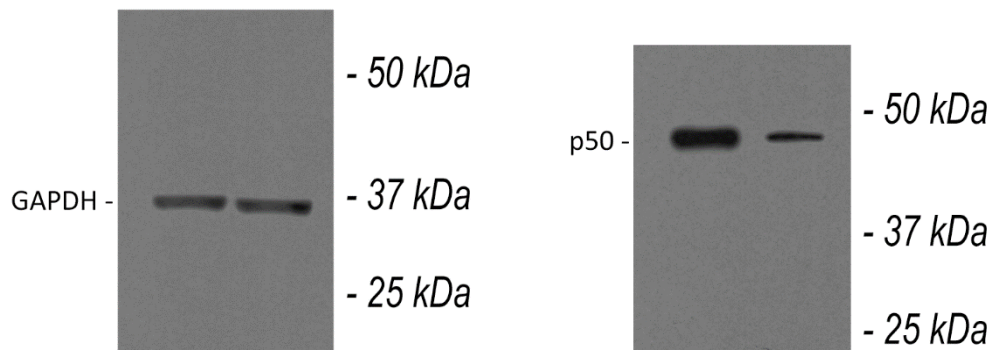

**Supplementary Figure 3.** Full scans of the entire original gels used in Figure 5C.

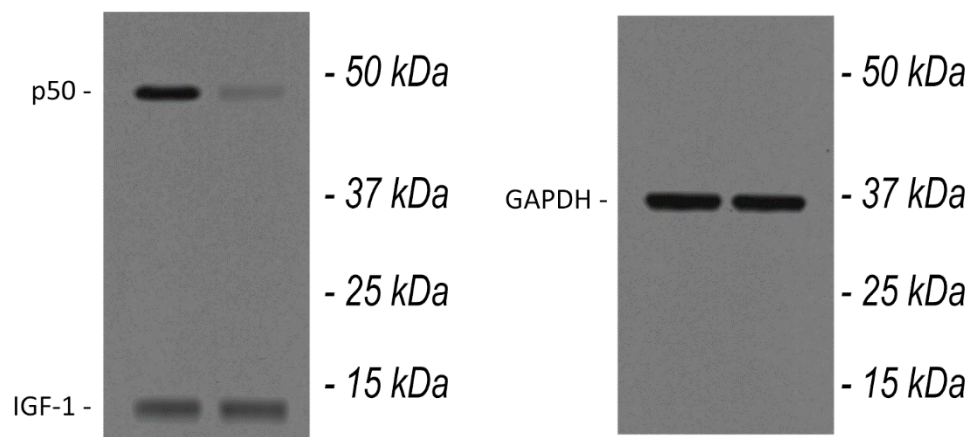

Supplement: Supplementary file [file 21785313]
